# Supplementary material
Source: MDPI journal article supplement (https://www.mdpi.com/2311-7524/10/3/287)
Supplement: s1 [file s1]

| Purpose                        | Name                          | Sequence (5'→3')                                                         |
|--------------------------------|-------------------------------|--------------------------------------------------------------------------|
| CDS clone                      | LbHSP17.9-F                   | CTTTCAATCACGATGTCTG                                                      |
|                                | LbHSP17.9-R                   | AGAATGGAGCTTCAGCCA                                                       |
| Analysis of gene expression    | LbHSP17.9-F                   | CGGAAGAAGGAGCAGGAGG                                                      |
|                                | LbHSP17.9-R                   | CGCCTTCTTGAAATCCGGCAT                                                    |
|                                | LbCu/ZnSOD-qF                 | CAGCAATAGCACCGC                                                          |
|                                | LbCu/ZnSOD-qR(Unigene0032128) | TTGGTCGTATCCCCAAAGGAA                                                    |
|                                | LbFeSOD-qF                    | GCTTCAGCAAATCGAAAAG                                                      |
|                                | LbFeSOD-qR(Unigene0036934)    | GAGAATCGGAATATCACCCCA                                                    |
|                                | LbMnSOD-qF                    | CTCCCCGACCTCCCGTACGAC                                                    |
|                                | LbMnSOD-qR(Unigene0053746)    | AATAGCCCAGCCAAGTGCCCC                                                    |
|                                | LbCAT -qF                     | ACCAACCCGAAATCCCACATC                                                    |
|                                | LbCAT- qR(Unigene0043696)     | ATTCAGCACCCAGCCTCCCCA                                                    |
|                                | LbPOD-qF                      | GGAGGACAAGCCTGAACCCC                                                     |
|                                | LbPOD -qR(Unigene0032097)     | GTGCCACCAGACAGAGCAAC                                                     |
| Reference gene                 | actin-F                       | CCCCACTCAATCCCAAGGCAA                                                    |
|                                | actin-R(JX826390)             | CGGAAGTCCAGCACAATACCA                                                    |
| VIGS/transient over-expression | TRV2- <i>LbHSP17.9-F</i>      | CTAGAAGGCCTCCATGGGGATCCCTAACACCCGCATCGACTGG;                             |
| vector                         | TRV2- <i>LbHSP17.9-R</i>      | GCCTCGAGACGCGTGAGCTCGGACAGTGACAGTGAGGACGC;<br>GATCCCTAACACCCGCATCGACTGG; |
|                                | OE- <i>LbHSP17.9-F</i>        | GCTTTCGCGAGCTCGGTACCATGTCGATCATCCGCAGGAGCAACGTCT;                        |
|                                | OE- <i>LbHSP17.9-R</i>        | CGCCCTTGCTACCATGGATCCGCCAGAGATATCGATGGATTTG;                             |
|                                |                               |                                                                          |
